# Supplementary material for: The Concentration of Organic Acids in Cranberry Juice Modulates the Gut Microbiota in Mice
Source: MDPI journal article supplement (doi:10.3390/ijms222111537), 2021-10-26
Supplement: s1 [file s1]

## Supplementary material

**Table S1.** Comparison of the physicochemical characteristics of the 1:1 CJ [25] and the 0% DCJ of the current study. The column “% variation” corresponds to the variation of values of the 0% DCJ compared to the 1:1 CJ. A different letter on the same line mean that there is a statistically significant difference between the juices at a probability level of 0.05.

| <b>Cranberry juices</b>                            | <b>1:1 CJ</b>                   | <b>0% DCJ</b>                   | <b>% variation</b> | <b>p-value</b> |
|----------------------------------------------------|---------------------------------|---------------------------------|--------------------|----------------|
| <b>pH</b>                                          | 2.51 ± 0.02 <sup>a</sup>        | 2.59 ± 0.03 <sup>b</sup>        | ↗ 3.1              | 0.0154         |
| <b>Titrateable acidity (g of citric acid eq/L)</b> | 9.49 ± 0.06 <sup>a</sup>        | 9.25 ± 0.05 <sup>b</sup>        | ↘ 2.5              | <0.0001        |
| <b>°Brix</b>                                       | 7.37 ± 0.06 <sup>a</sup>        | 6.90 ± 0.0 <sup>b</sup>         | ↘ 6.4              | 0.0002         |
| <b>Organic acids (mg/L)</b>                        |                                 |                                 |                    |                |
| Quinic                                             | 10 710.76 ± 31.53 <sup>a</sup>  | 10 354.84 ± 306.22 <sup>a</sup> | ↘ 3.3              | 0.1157         |
| Malic                                              | 6 571.50 ± 72 <sup>a</sup>      | 6 029.82 ± 101.43 <sup>b</sup>  | ↘ 8.2              | 0.0017         |
| Citric                                             | 12 467.90 ± 511.09 <sup>a</sup> | 11 589.89 ± 204.20 <sup>a</sup> | ↘ 7.0              | 0.0501         |
| <b>Anthocyanins (mg of cyanidin eq/L)</b>          |                                 |                                 |                    |                |
| C-3-galactoside                                    | 17.10 ± 0.35 <sup>a</sup>       | 65.14 ± 0.51 <sup>b</sup>       | ↗ <b>73.8</b>      | <0.0001        |
| C-3-glucoside                                      | 2.80 ± 0.19 <sup>a</sup>        | 2.15 ± 0.12 <sup>b</sup>        | ↘ 23.2             | 0.0074         |
| C-3-arabinoside                                    | 33.81 ± 1.12 <sup>a</sup>       | 51.12 ± 0.69 <sup>b</sup>       | ↗ 33.9             | <0.0001        |
| P-3-galactoside                                    | 25.02 ± 0.81 <sup>a</sup>       | 84.74 ± 0.54 <sup>b</sup>       | ↗ <b>70.5</b>      | <0.0001        |
| P-3-glucoside                                      | 7.62 ± 0.41 <sup>a</sup>        | 8.50 ± 0.10 <sup>b</sup>        | ↗ 10.4             | 0.0246         |
| P-3-arabinoside                                    | 23.31 ± 0.17 <sup>a</sup>       | 37.94 ± 0.62 <sup>b</sup>       | ↗ <b>38.6</b>      | <0.0001        |
| Total                                              | 109.66 ± 2.07 <sup>a</sup>      | 249.58 ± 2.42 <sup>b</sup>      | ↗ <b>56.1</b>      | <0.0001        |
| <b>Proanthocyanidins (mg of epicatechin eq/L)</b>  |                                 |                                 |                    |                |
| Monomers                                           | 49.41 ± 0.68 <sup>a</sup>       | 39.35 ± 0.64 <sup>b</sup>       | ↘ 20.4             | <0.0001        |
| 2-3mers                                            | 139.82 ± 0.76 <sup>a</sup>      | 148.36 ± 1.80 <sup>b</sup>      | ↗ 5.8              | 0.0016         |
| 4-6mers                                            | 21.4 ± 0.25 <sup>a</sup>        | 59.92 ± 1.24 <sup>b</sup>       | ↗ <b>64.3</b>      | <0.0001        |
| 7-10mers                                           | 2.77 ± 0.37 <sup>a</sup>        | 4.28 ± 0.27 <sup>b</sup>        | ↗ 35.3             | 0.0047         |
| Polymers                                           | 18.37 ± 1.38 <sup>a</sup>       | 5.55 ± 0.52 <sup>b</sup>        | ↘ <b>69.8</b>      | <0.0001        |
| Total                                              | 231.77 ± 3.45 <sup>a</sup>      | 257.46 ± 2.36 <sup>b</sup>      | ↗ 10.0             | <0.0001        |
| <b>Total polyphenols (mg of gallic acid eq/L)</b>  | 583.48 ± 87.93 <sup>a</sup>     | 1 074.79 ± 4.90 <sup>b</sup>    | ↗ <b>45.7</b>      | <0.0001        |

**Table S2.** Catalog numbers of primer sets used for qRT-PCR (Qiagen).

| Primers           | Catalog number |
|-------------------|----------------|
| Mouse <i>Tnf</i>  | PPM03113G      |
| Mouse <i>Muc2</i> | PPM24739G      |
| Mouse <i>IL22</i> | PPM05481A      |
| Mouse <i>Ppia</i> | PPM03717B      |
| Mouse <i>Gusb</i> | PPM05490C      |
